# Supplementary material
Source: HighWire-hosted journal article supplement (https://cmajopen.ca/highwire/filestream/81382/field_highwire_adjunct_files/0/2019-0049-1-at.pdf)
Supplement: 2019-0049-1-at.pdf [file 2019-0049-1-at.pdf]

**Appendix 1 (as supplied by the authors):** Supplemental tables

Supplemental Table S1: Distribution of legislation by province and risk factors

|                         | Tobacco<br>Control<br>(n=190) | Physical<br>Activity<br>(n=215) | Healthy<br>Eating<br>(n=101) | Multiple<br>factors<br>(n=100) | Total<br>(n=718) |
|-------------------------|-------------------------------|---------------------------------|------------------------------|--------------------------------|------------------|
|                         | n (%)                         | n (%)                           | n (%)                        | n (%)                          | n (%)            |
| Newfoundland & Labrador | 18 (9.5)                      | 11 (5.1)                        | 2 (2.0)                      | 3 (3.0)                        | 39 (5.4)         |
| Prince Edward Island    | 11 (5.8)                      | 10 (4.7)                        | 1 (1.0)                      | 6 (6.0)                        | 33 (4.6)         |
| Nova Scotia             | 16 (8.4)                      | 16 (7.4)                        | 5 (4.9)                      | 11 (11.0)                      | 59 (8.2)         |
| New Brunswick           | 9 (4.7)                       | 10 (4.7)                        | 4 (4.0)                      | 2 (2.0)                        | 34 (4.7)         |
| Quebec                  | 11 (5.8)                      | 13 (6.1)                        | 8 (7.9)                      | 9 (9.0)                        | 50 (7.0)         |
| Ontario                 | 23 (12.1)                     | 52 (24.2)                       | 24 (23.8)                    | 14 (14.0)                      | 122 (17.0)       |
| Manitoba                | 21 (11.1)                     | 19 (8.8)                        | 13 (12.9)                    | 10 (10.0)                      | 77 (10.7)        |
| Saskatchewan            | 9 (4.7)                       | 21 (9.8)                        | 9 (8.9)                      | 10 (10.0)                      | 60 (8.4)         |
| Alberta                 | 17 (9.0)                      | 18 (8.4)                        | 10 (9.9)                     | 8 (8.0)                        | 62 (8.6)         |
| British Columbia        | 12 (6.3)                      | 24 (11.2)                       | 11 (10.9)                    | 7 (7.0)                        | 62 (8.6)         |
| Northwest Territories   | 13 (6.8)                      | 6 (2.8)                         | 2 (2.0)                      | 3 (3.0)                        | 33 (4.6)         |
| Nunavut                 | 6 (3.2)                       | 5 (2.3)                         | 1 (1.0)                      | 3 (3.0)                        | 20 (2.8)         |
| Yukon                   | 7 (3.7)                       | 4 (1.9)                         | 1 (1.0)                      | 5 (5.0)                        | 22 (3.1)         |
| Canada                  | 17 (9.0)                      | 6 (2.8)                         | 10 (9.9)                     | 9 (9.0)                        | 45 (6.3)         |

Notes: Multiple factors refers to legislation targeting more than one risk factor (i.e., tobacco control, physical activity, healthy eating). Total includes 'general' legislation (e.g., provincial Public Health Acts).

Supplemental Table S2: Condensed primary purposes of the legislation by risk factors

|                                                                         | Tobacco<br>Control<br>(n=190)<br>n (%) | Physical<br>Activity<br>(n=215)<br>n (%) | Healthy<br>Eating<br>(n=101)<br>n (%) | Multiple<br>(n=100)<br>n (%) | Total<br>(n=718)<br>n (%) |
|-------------------------------------------------------------------------|----------------------------------------|------------------------------------------|---------------------------------------|------------------------------|---------------------------|
| Tobacco control                                                         | 129 (67.9)                             | 0 (0.0)                                  | 0 (0.0)                               | 1 (1.0)                      | 131 (18.3)                |
| Food industry regulation                                                | 0 (0.0)                                | 0 (0.0)                                  | 61 (60.4)                             | 13 (13.0)                    | 74 (10.3)                 |
| General public health regulation                                        | 1 (0.5)                                | 0 (0.0)                                  | 2 (2.0)                               | 1 (1.0)                      | 67 (9.3)                  |
| Environmental, natural resource &<br>parks regulation                   | 0 (0.0)                                | 46 (21.4)                                | 0 (0.0)                               | 7 (7.0)                      | 54 (7.5)                  |
| Financial regulation                                                    | 26 (13.7)                              | 16 (7.4)                                 | 4 (4.0)                               | 5 (5.0)                      | 51 (7.1)                  |
| Planning, development & land use                                        | 3 (1.6)                                | 36 (16.7)                                | 0 (0.0)                               | 6 (6.0)                      | 46 (6.4)                  |
| Food and drug safety                                                    | 3 (1.6)                                | 0 (0.0)                                  | 14 (13.9)                             | 22 (22.0)                    | 45 (6.3)                  |
| Municipal empowerment and<br>regulation                                 | 0 (0.0)                                | 18 (8.4)                                 | 1 (1.0)                               | 0 (0.0)                      | 40 (5.6)                  |
| Create, modify & regulate built<br>environment for<br>physical activity | 0 (0.0)                                | 30 (14.0)                                | 0 (0.0)                               | 6 (6.0)                      | 36 (5.0)                  |
| General health and safety                                               | 7 (3.7)                                | 15 (7.0)                                 | 3 (3.0)                               | 7 (7.0)                      | 33 (4.6)                  |
| Promoting physical activity                                             | 0 (0.0)                                | 20 (9.3)                                 | 0 (0.0)                               | 8 (8.0)                      | 31 (4.3)                  |
| Transportation system regulation                                        | 11 (5.8)                               | 14 (6.5)                                 | 0 (0.0)                               | 5 (5.0)                      | 30 (4.2)                  |
| Child care operation regulation                                         | 0 (0.0)                                | 2 (0.9)                                  | 6 (5.9)                               | 18 (18.0)                    | 30 (4.2)                  |
| Education system oversight                                              | 2 (1.1)                                | 13 (6.1)                                 | 3 (3.0)                               | 0 (0.0)                      | 24 (3.3)                  |
| Long term care facilities operation<br>regulation                       | 0 (0.0)                                | 0 (0.0)                                  | 4 (4.0)                               | 15 (15.0)                    | 20 (2.8)                  |
| General government regulation                                           | 3 (1.6)                                | 5 (2.3)                                  | 1 (1.0)                               | 0 (0.0)                      | 16 (2.2)                  |
| Promoting healthy eating                                                | 0 (0.0)                                | 0 (0.0)                                  | 7 (6.9)                               | 3 (3.0)                      | 11 (1.5)                  |
| Criminal justice                                                        | 4 (2.1)                                | 1 (0.5)                                  | 0 (0.0)                               | 1 (1.0)                      | 6 (0.8)                   |
| First Nation & Metis agreement<br>enactment and enforcement             | 0 (0.0)                                | 0 (0.0)                                  | 1 (1.0)                               | 0 (0.0)                      | 5 (0.7)                   |

Notes: Multiple factors refers to legislation targeting more than one risk factor (i.e., tobacco control, physical activity, healthy eating). Total includes ‘general’ legislation (e.g., provincial Public Health Acts).
